# Supplementary material for: NaCl-Induced Elicitation Alters Physiology and Increases Accumulation of Phenolic Compounds in Melissa officinalis L.
Source: MDPI journal article supplement (doi:10.3390/ijms22136844), 2021-06-25
Supplement: s1 [file s1]

## SUPPLEMENTARY MATERIALS

# NaCl-induced Elicitation Alters Physiology and Increases Accumulation of Phenolic Compounds in *Melissa officinalis* L.

Barbara Hawrylak-Nowak <sup>1\*</sup>, Sławomir Dresler <sup>2</sup>, Maria Stasińska-Jakubas <sup>1</sup>, Magdalena Wójciak <sup>2</sup>, Ireneusz Sowa <sup>2</sup>, and Renata Matraszek-Gawron <sup>1</sup>

<sup>1</sup> Department of Botany and Plant Physiology, Faculty of Environmental Biology, University of Life Sciences in Lublin, Akademicka 15, 20-950 Lublin, Poland; barbara.nowak@up.lublin.pl (B.H.N.); jakubas.ms@gmail.com (M.S.J); renata.matraszek@up.lublin.pl (R.M.G)

<sup>2</sup> Department of Analytical Chemistry, Medical University of Lublin, Chodźki 4a, 20-093 Lublin, Poland; slawomir.dresler@umlub.pl (S.D.); magdalenawojciak@umlub.pl (M.W.); i.sowa@umlub.pl (I.S.)

\* Correspondence: barbara.nowak@up.lublin.pl

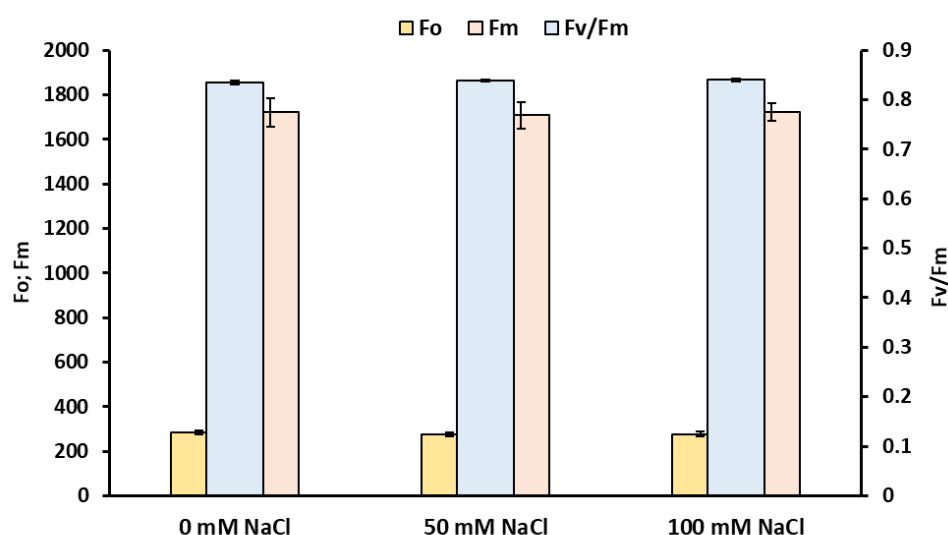

**Supplementary Figure S1.** Effect of NaCl application on the selected parameters of chlorophyll *a* fluorescence in *Melissa officinalis* after 10 days of exposure. Data are means  $\pm$ SD ( $n=10$ ). The absence of letters means that there are no significant differences between treatments ( $p<0.05$ , Tukey's test).

**Supplementary Table S1.** Effect of NaCl application on the content of selected phenolic compounds per plant of *Melissa officinalis* after 10 days of exposure.

| Content of phenolic compounds    | NaCl concentration |            |             |
|----------------------------------|--------------------|------------|-------------|
|                                  | 0 mM NaCl          | 50 mM NaCl | 100 mM NaCl |
| soluble phenols (mg per plant)   | 22.18              | 22.11      | 22.19       |
| soluble flavonols (mg per plant) | 9.90               | 9.74       | 10.48       |
| rosmarinic acid (mg per plant)   | 4.60               | 5.88       | 6.63        |
| anthocyanins (ng per plant)      | 7.71               | 16.00      | 33.90       |

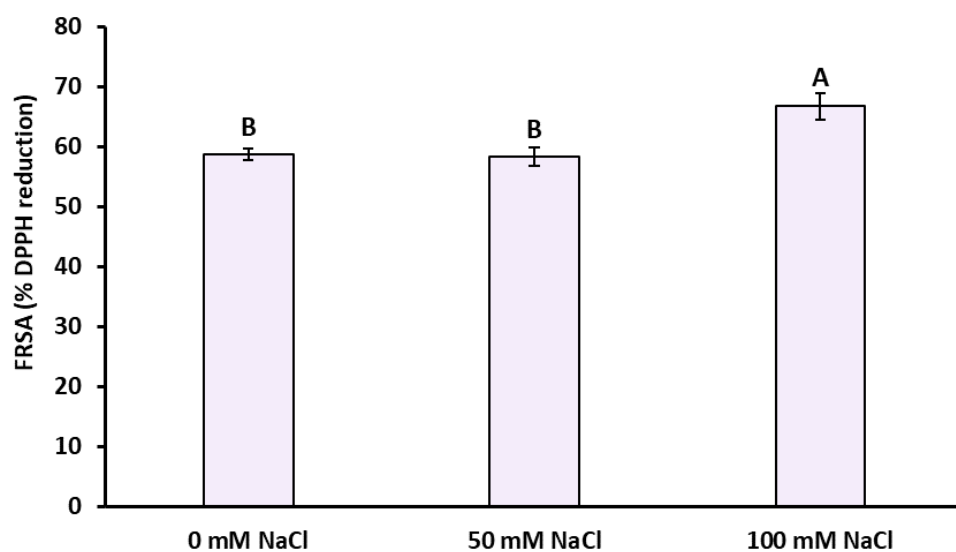

**Supplementary Figure S2.** Free radical scavenging activity (FRSA) of extracts of *Melissa officinalis* grown for 10 days at different NaCl treatments. Data are means  $\pm$ SD (n=4). Means followed by different letters differ statistically significantly ( $p < 0.05$ , Tukey's test).
